# Supplementary material for: TIM4 expression by dendritic cells mediates uptake of tumor-associated antigens and anti-tumor responses
Source: PubMed Central journal article supplement (PMC8046802; doi:10.1038/s41467-021-22535-z), 2021-04-14
Supplement: 41467_2021_22535_MOESM1_ESM.pdf [file 41467_2021_22535_MOESM1_ESM.pdf]

**a**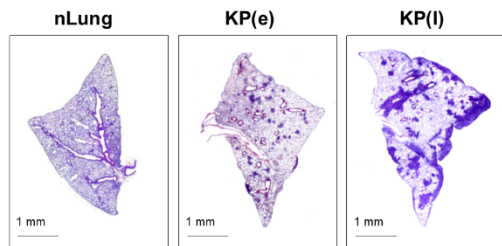**b**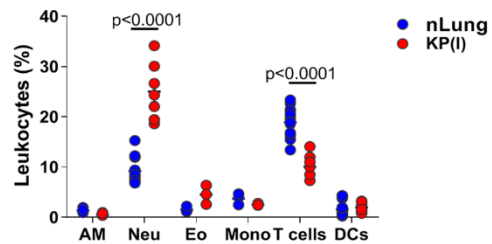**c**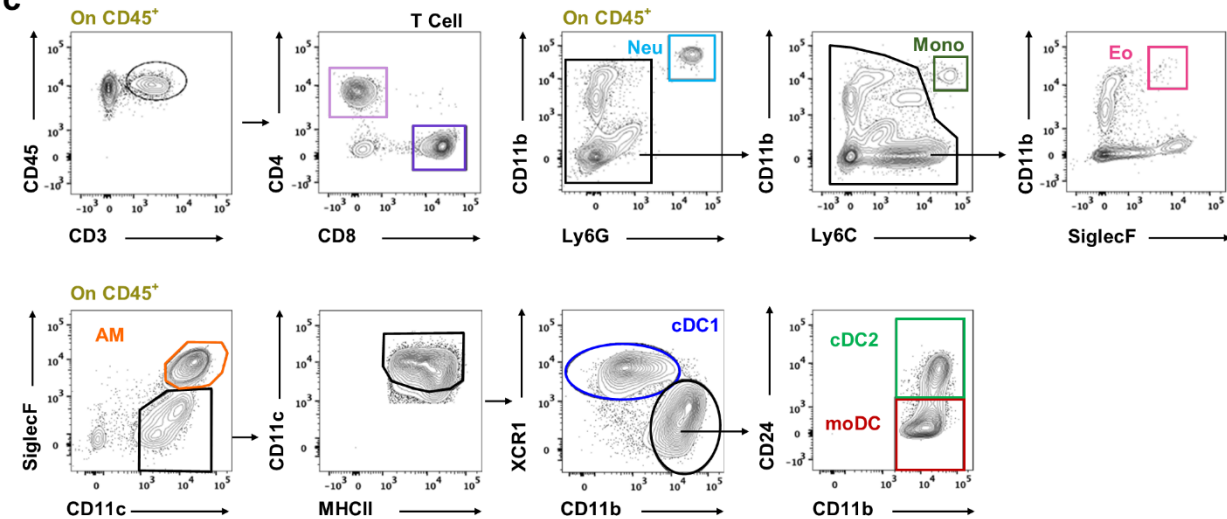**d**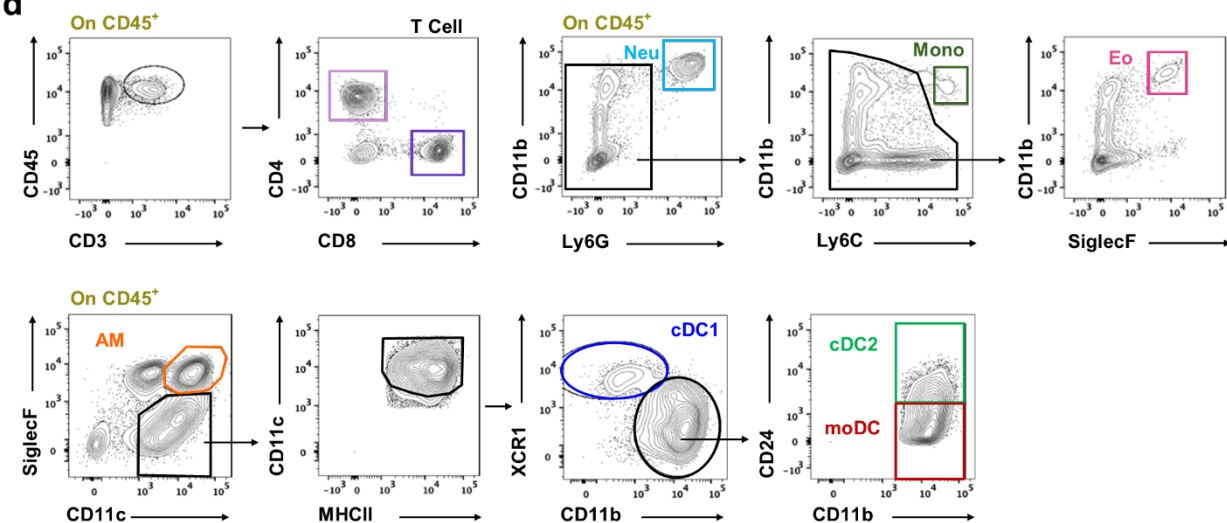**e**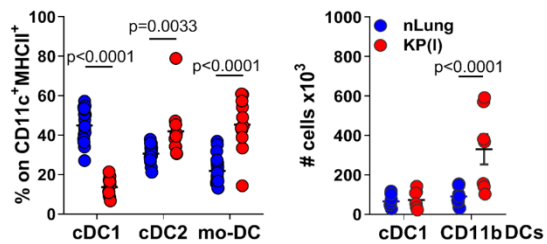**f**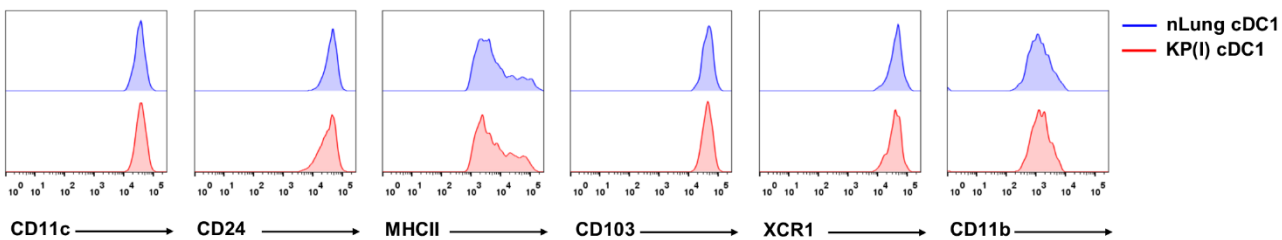

**Supplementary Figure 1. Tumor-infiltrating leukocytes and cDC1 profiling in KP bearing lungs.**

**a)** Representative hematoxylin/eosin sections illustrating nodules in PBS injected mice (nLung), early and late KP-bearing lungs. Scale bar 1mm. **b)** Relative abundance of immune subsets (AM, Alveolar macrophages; Neu, neutrophils; Eo, eosinophils; Mono, monocytes) in nLung or late KP-bearing lung tumors. Data represent 2 independent experiments. nLung: AM n=4, Neu=17, Eo n=3, Mono n=3, T cells n=16 and DCs n=17. KP(l): AM n=10, Neu=17, Eo n=3, Mono n=3, T cells n=16 and DCs n=17. **c-d)** Gating strategy used for the identification of leukocytes populations in nLung (**c**) and KP-bearing lungs (**d**). **e)** Frequencies of lung resident cDC1, cDC2 and monocyte-derived DCs (moDCs) in nLung and late KP tumors. Absolute numbers of cDC1 and CD11b<sup>+</sup> DCs in late KP tumors. Pooled data from 3 independent experiments. nLung n=20 or 11, KP(l) n=12 or 7. **f)** Representative histograms of lineage differentiation and maturation markers on cDC1 in nLung or late KP tumors. All data are expressed as mean  $\pm$  SEM and significance was assessed by two-ways ANOVA followed by Sidak's post-test. Raw data and statistical analysis are available in source data file.

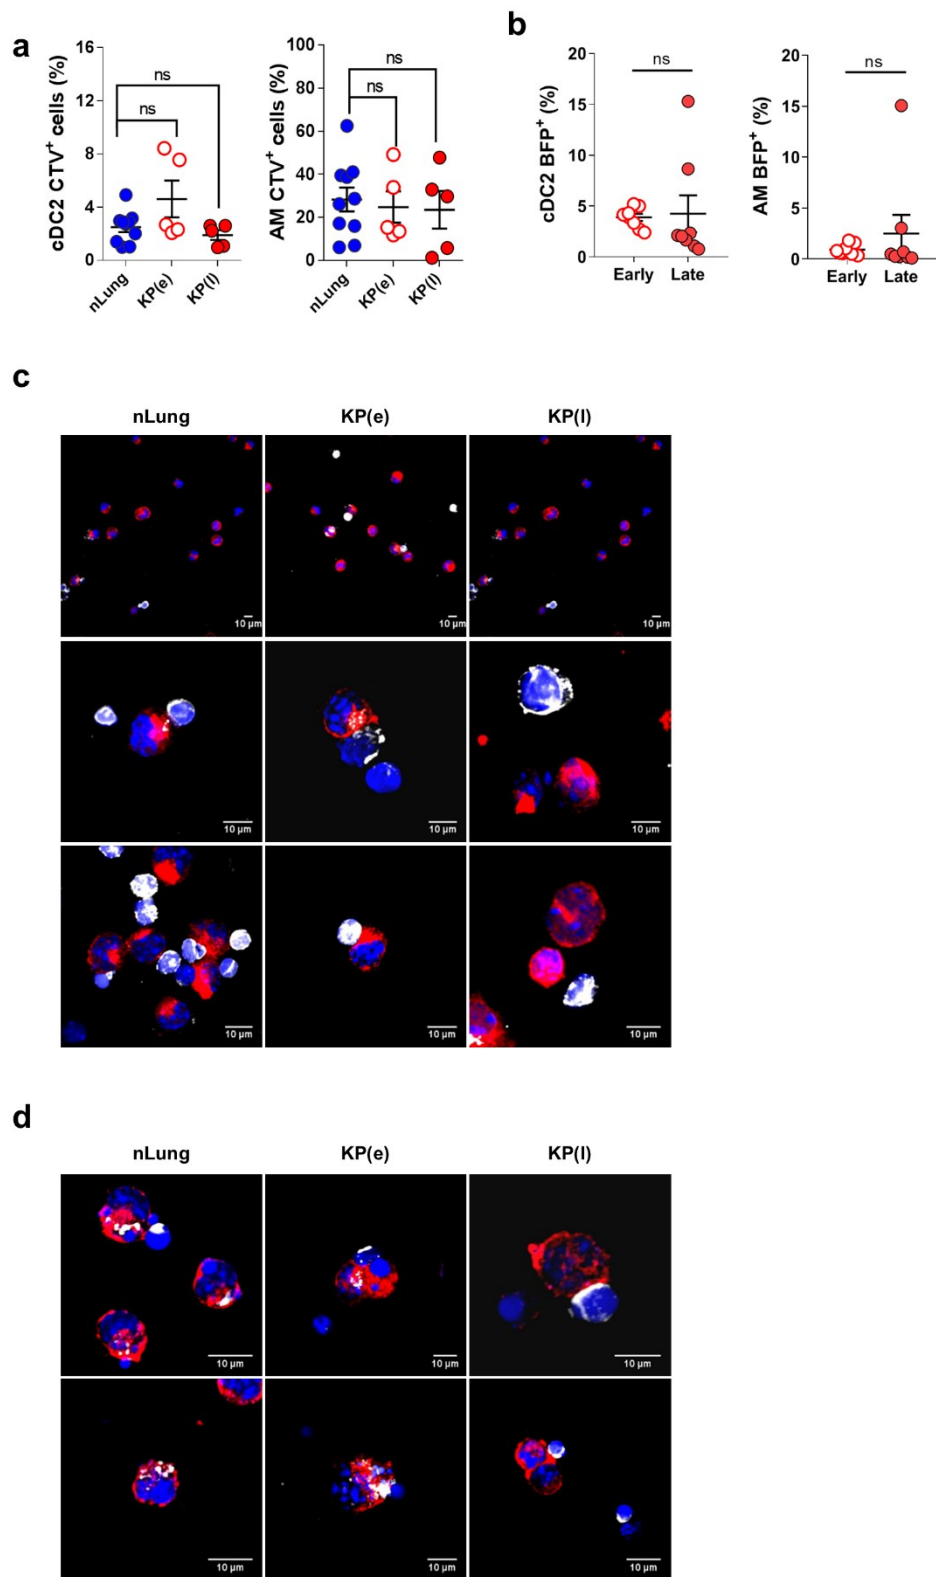

**Supplementary Figure 2. Uptake of apoptotic thymocytes and tumor cells by lung phagocytes along tumor progression.**

**a)** Relative to Fig 1a. nLung, early and late KP tumor-bearing mice were inoculated i.t. with CTV-labeled apoptotic thymocytes. The amount of fluorescence associated to cDC2 and alveolar macrophages (AM) was evaluated 2hrs post injection. nLung n=8, KP(e) n=5, KP(l) n=4. Significance was assessed by two-ways ANOVA followed by Sidak's post-test. **b)** Relative to Fig 1b. Quantification of BFP fluorescence associated to cDC2 and AM in lungs bearing early or late KP-BFP tumors. Data are pooled from two experiments with n=8 mice/group, two-tailed unpaired *t*-test. **c)** Relative to Fig 1c. Low and high magnification images as examples of binding of apoptotic thymocytes to cDC1 from control, early or late tumors. **d)** Relative to Fig 1d. Representative high magnification micrographs of uptake of apoptotic cells after 2hrs of incubation. All data are expressed as mean  $\pm$  SEM. Raw data and statistical analysis are available in source data file.

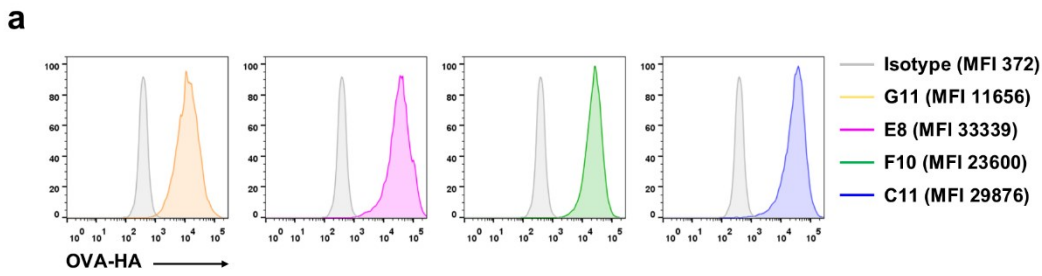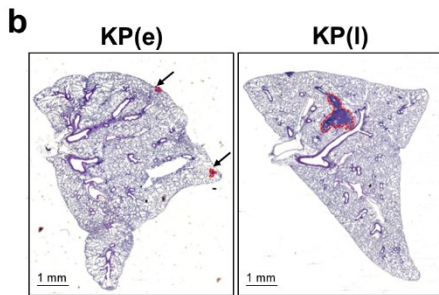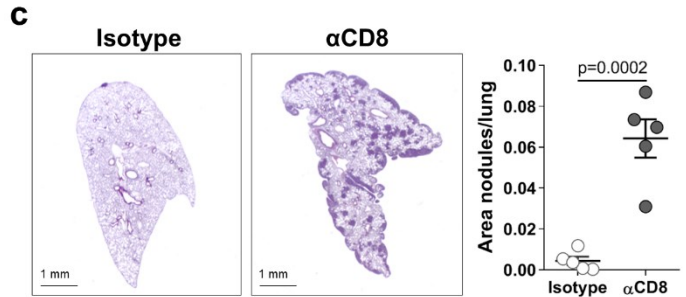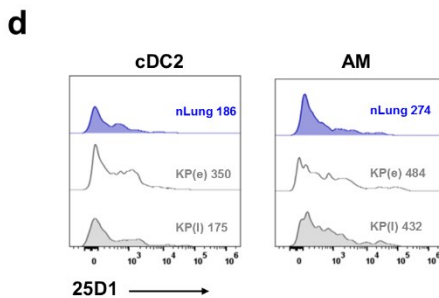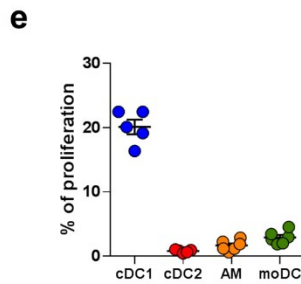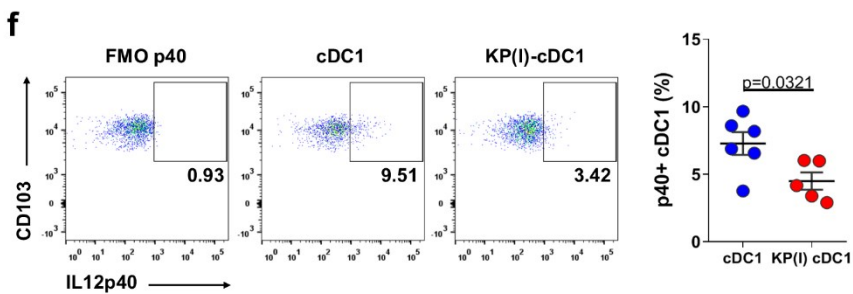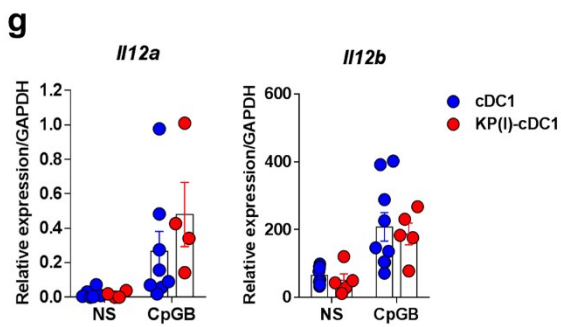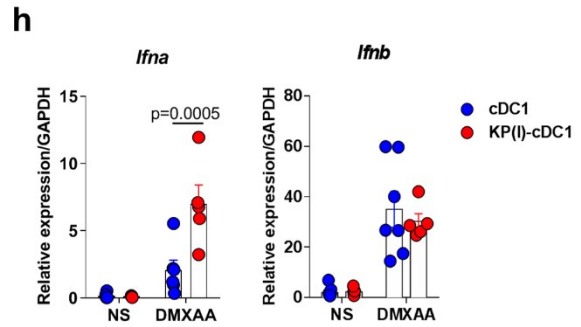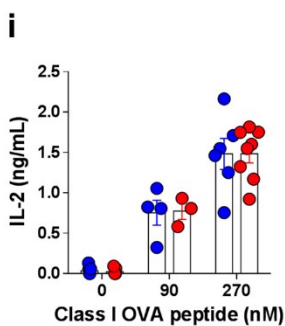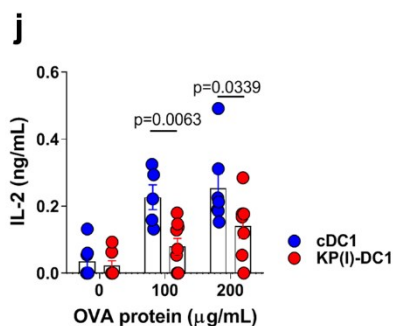

**Supplementary Figure 3. Characterization of KP-OVA tumors, controls for cross-presentation of KP-OVA *in vivo*, cytokine production and cross-presentation of soluble antigens delivered *ex vivo*.**

**a)** KP cells were transduced with a lentiviral vector expressing HA-OVA. The population was subcloned and HA-OVA expression in individual clones was evaluated by intracellular flow-cytometry. Clone G11 showing the lowest expression was selected for subsequent experiments. **b)** Hematoxylin/eosin staining of lung sections from KP-OVA early or late tumors. **c)** Mice were treated with anti CD8 depleting antibodies during challenge with KP-OVA tumors. Lungs were harvested two weeks after challenge for analysis of tumor burden. Representative hematoxylin/eosin staining shows nodules from isotype controls and CD8 depleted mice (5 mice/group). Quantification of nodules was calculated semi-automatically on 3 sections of the left lobe/animal. Significance was assessed by two-tailed unpaired *t*-test. **d)** Relative to Fig 1e. Controls of staining specificity by OVA-peptide:MHC-I antibody 25D1.16. Representative histograms show labeling in cDC2 and AM in nLung, early and late KP-OVA tumor bearing lungs. Peaks are overlaid with the corresponding isotype control. **e)** Cross-presentation by phagocytes in KP-OVA tumors. cDC1, cDC2, AM and moDCs were sorted from KP-OVA tumors and plated with CFSE-labeled OT-I cells *ex vivo*. The extent of proliferation induced by each subset is plotted as percentage of cells undergoing at least two proliferation cycles. One representative of three independent experiments is plotted, cDC1 n=5, cDC2 n=5, AM n=6, moDC n=6. **f)** *In vivo* production of IL-12p40 by nLung cDC1 and late KP tumor cDC1 was assessed by intracellular cytokine detection. Significance was assessed by two-tailed unpaired *t*-test of two independent experiments, cDC1 n=6, KP(I)-cDC1 n=5. **g, h)** cDC1 from nLung or late KP-bearing lungs were isolated by cell sorting and stimulated *ex vivo* for 3 hrs with TLR9 (CpGB) and STING agonists (DMXAA). Transcript expression of *Il12a/Il12b* (**g**) and *Ifna/Ifnb* (**h**) were evaluated by qPCR. Data in **g** cDC1 n=8 and KP(I)-cDC1 n=5, data in **h** cDC1 n=7 and KP(I)-cDC1 n=5, from 4 independent experiments each with pool of 3 mice/group. Significance was assessed by two-ways ANOVA followed by Sidak's post-test. **i, j)** cDC1 from nLung or KP late tumor bearing lungs were pulsed *ex vivo* with OVA class I peptide (**i**) or OVA protein (**j**) at different doses and co-incubated with OT-I. IL-2 was quantified by ELISA upon 16 hrs of co-culture. Each dot represents the pool of three mice from three independent experiments. Significance was assessed by two-ways ANOVA followed by Sidak's post-test. All data are expressed as mean  $\pm$  SEM. Raw data and statistical analysis are available in source data file.

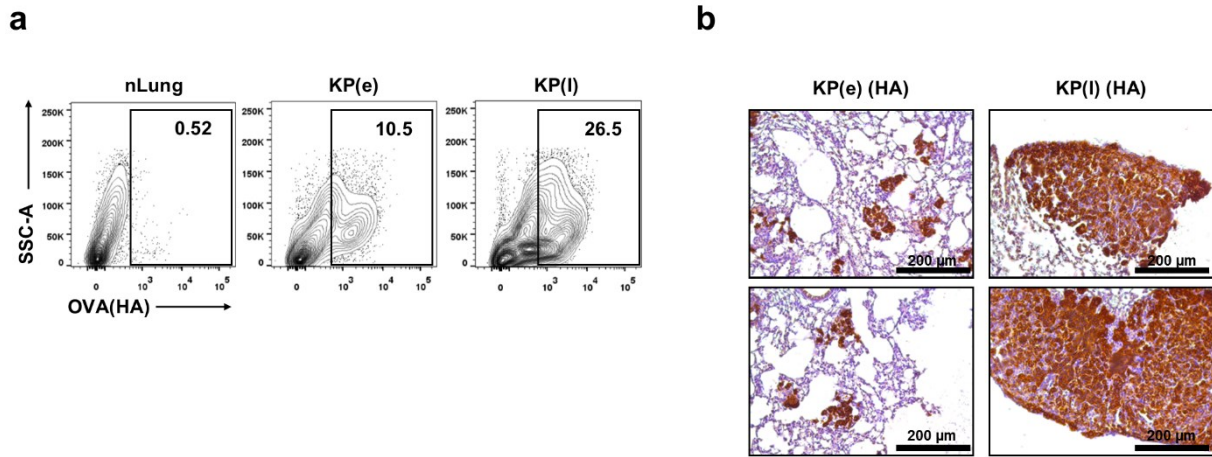

**Supplementary Figure 4. Expression of OVA antigen is maintained in late KP-OVA tumors.**  
**a, b)** OVA expression in early and late KP-OVA tumors. **a)** Intracellular flow cytometry using anti HA antibodies on total lung cell suspensions. Representative plots are gated on live CD45<sup>-</sup> cells. **b)** Immunohistochemistry using anti HA antibodies on section of early or late KP-OVA tumors. Scale bar: 200 μm.

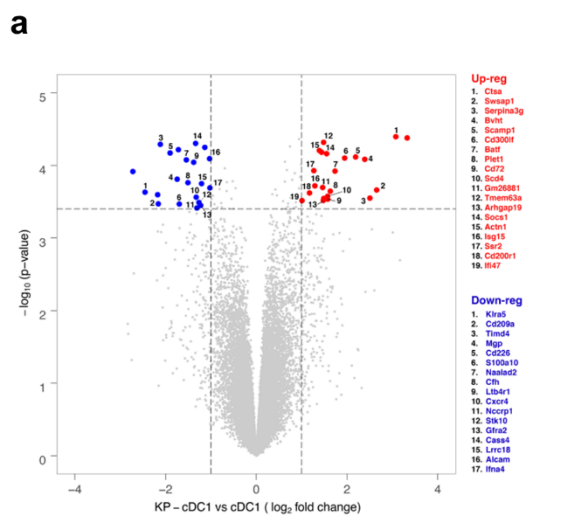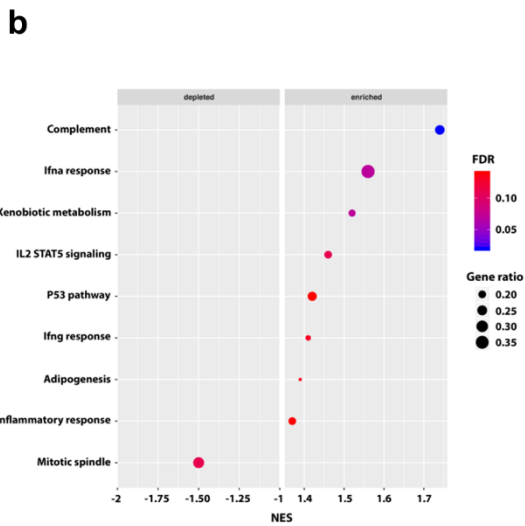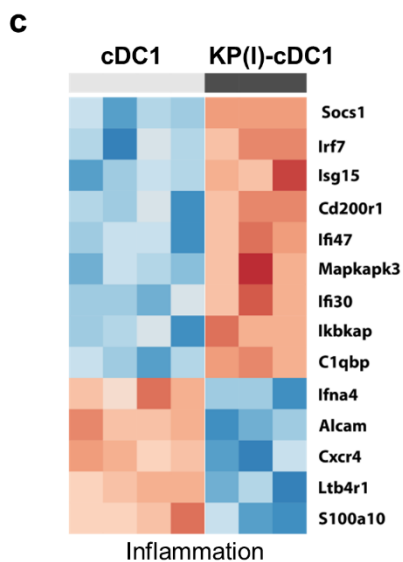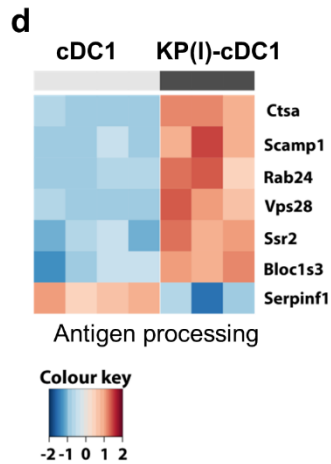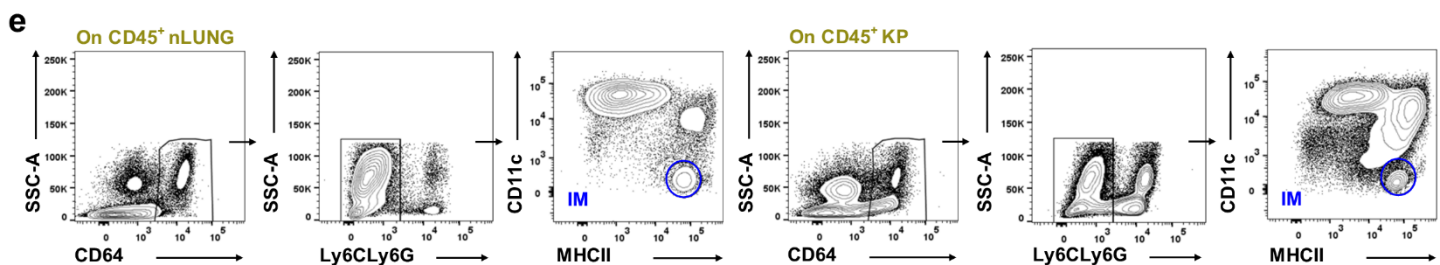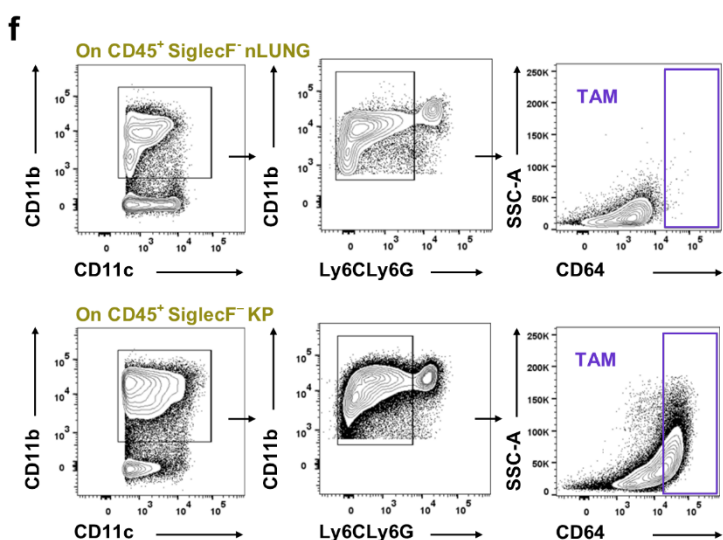

**Supplementary Figure 5. Modulation of genes involved in antigen processing and inflammation and downregulation in other tumor models.**

**a)** Volcano plot showing differentially expressed genes in cDC1 from nLung or KP late tumor bearing lungs. Genes with a q-value < 5% and a fold change  $\geq 2$  or  $\leq -2$  are identified as significantly modulated (red and blue, respectively), **b)** Dot plot of the significantly enriched and depleted gene sets from Gene Set Enrichment Analysis of cDC1 sorted from lungs with established KP tumors and residing in healthy lung tissues (normalized enrichment score NES > 0). Dot color indicates statistical significance of the enrichment; dot size represents the fraction of genes annotated to each term. Gene sets are ranked in decreasing order based on the NES value. FDR: false discovery rate; NES: normalized enrichment score. **c, d)** Expression levels of genes differentially expressed (FDR < 10%, absolute fold change > 1.5) and annotated as interferon-alpha pathway (**c**) and antigen processing (**d**) from gene ontology in cDC1 from healthy and KP tumor bearing mice. **e, f)** Gating strategy used for the identification of Interstitial Macrophages (IM, **e**) and Tumor-associated macrophages (TAM, **f**) in nLung and KP-bearing lungs. In **a** to **d** differentially expressed genes were identified using the Significance Analysis of Microarray (SAM) algorithm, with a false discovery rate (FDR)  $\leq 5\%$  and absolute fold change larger than a selected threshold (e.g.  $\geq 2$ ).



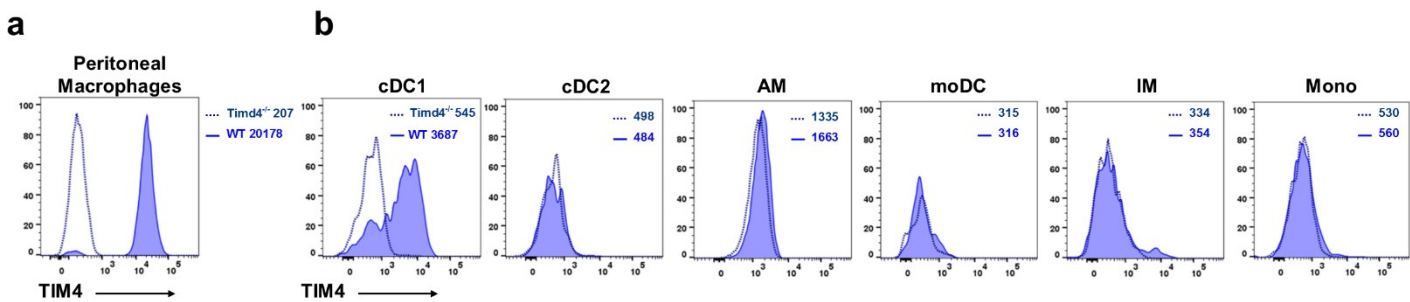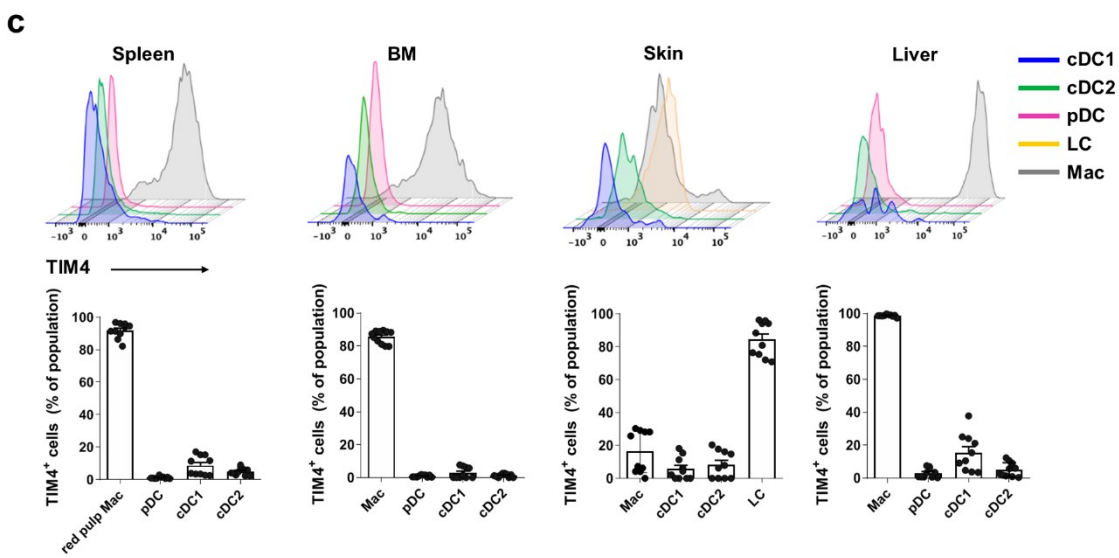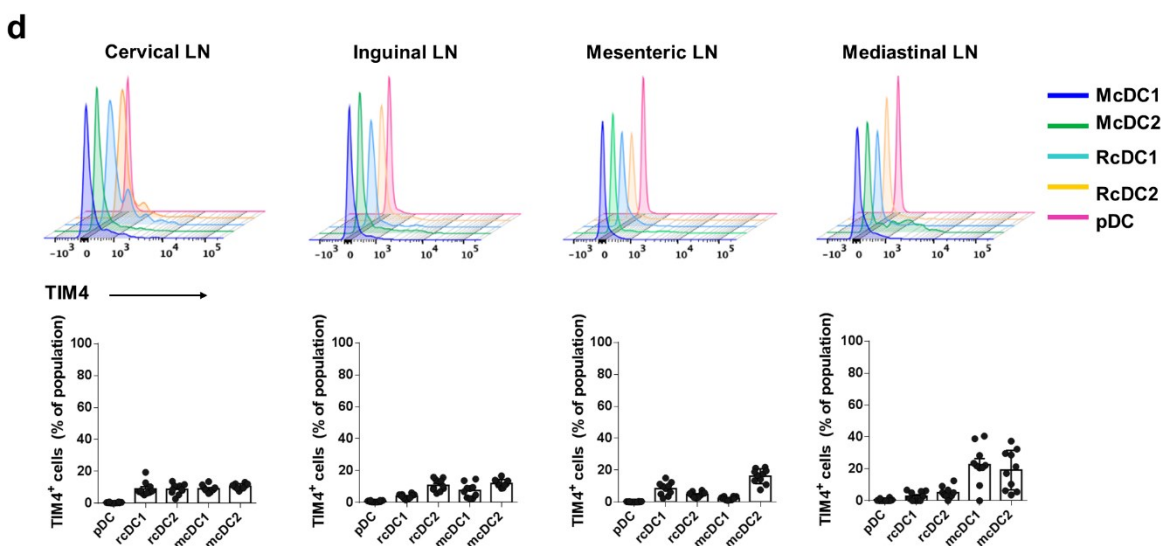

**Supplementary Figure 6. Profile of TIM4 expression in DCs subsets and across tissues.**

**a)** Specificity of TIM4 labeling evaluated on peritoneal macrophages from WT or *Timd4*<sup>-/-</sup> mice. **b)** Analysis of TIM4 expression by all phagocytes in nLung cDC1, cDC2, AM, moDC, IM and Mono. Cells from *Timd4*<sup>-/-</sup> lungs were used as control for specificity of labeling. **c)** Expression across the tissues and subsets, as indicated. Macrophages (Mac), conventional (cDCs) and plasmacytoid dendritic cells (pDC), Langerhans cells (LC) in spleen, BM, skin and liver. Representative histograms and quantification of the percentage of cells expressing TIM4 (on the FMO control) in organs of 10 individual mice. **d)** Flow cytometry analysis of TIM4 expression by subsets of dendritic cells in cervical, inguinal, mesenteric and mediastinal lymph nodes. Dendritic cell subsets analyzed: plasmacytoid DCs (pDC), resident conventional DC1 (rcDC1), resident conventional DC2 (rcDC2), migratory conventional DC1 (mcDC1) and migratory conventional DC2 (mcDC2). Representative histograms and quantification of the percentage of cells expressing TIM4 was calculated in organs of 10 individual mice. All data are expressed as mean  $\pm$  SEM.

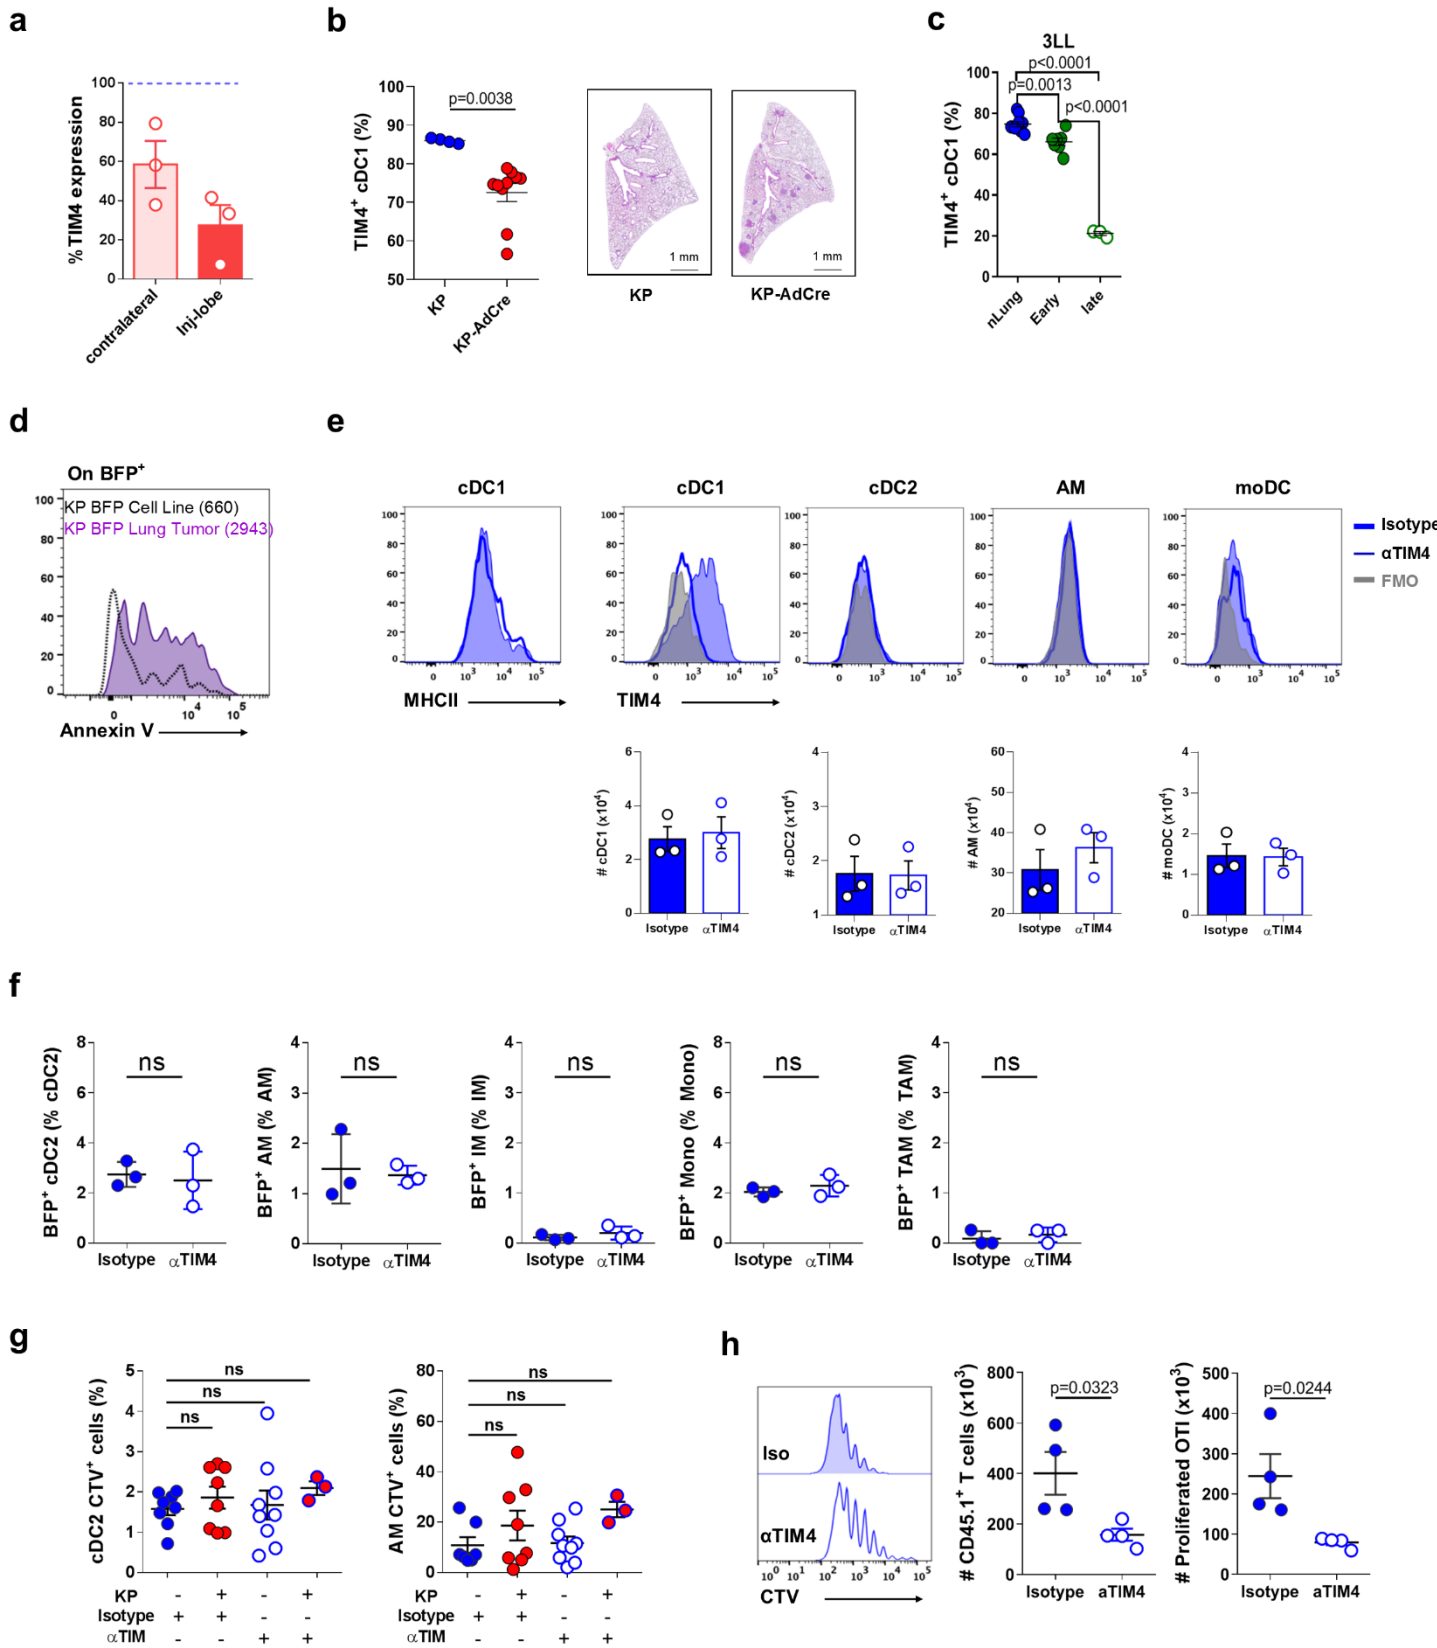

**Supplementary Figure 7. TIM4 down-regulation in different tumor models, expression of PS by cancer cells, specificity of TIM4 blockade.**

a) KP cells or PBS were injected orthotopically in the left lung lobe of healthy mice. After 28 days from tumor challenge lungs were harvested and TIM4 expression was analyzed in both injected or uninjected lobes, n=3 mice/group. **b)** TIM4 expression in cDC1 in KP autochthonous tumors. Tumors were induced by AdenoCre (AdCre) administration in KP mice, as described in M&M (KP-AdCre). Lungs from not treated (KP) and AdCre treated mice (KP-AdCre) were harvested 10 weeks after tumor induction for evaluation of TIM4 expression on whole lung tissues, KP n=4, KP-AdCre n=10. Graph represents 2 independent experiments. Statistical significance was assessed by two-tailed unpaired *t*-test. Representative hematoxylin/eosin sections of KP naïve and KP-AdCre are shown. **c)** TIM4 downregulation in lungs transplanted with 3LL. Mice were injected i.v. with Lewis Lung Carcinoma cells (3LL) and the lungs were harvested at day 14 (early) or 28 (late) after tumor implantation. Expression was compared to that found in control not challenged animals, nLung n= 7, Early n=7 and Late n=3. Statistical significance was assessed by one-way ANOVA followed by Tukey's post-test. **d)** Representative histograms showing Annexin V staining on KP-BFP cells in culture (Cell line) and in lung tissues 7 days after challenge (Lung Tumor). Numbers in parenthesis indicate MFI. **e)** Lungs were harvested from mice treated with anti-TIM4 antibodies or isotype control. Histograms show the indicated markers against FMO control in conventional dendritic cells (cDCs), AM and moDC. Graphs below indicate absolute numbers of each cell subset, one representative of two independent experiments with n=3 mice/group is shown **f)** Relative to Fig 4a. Uptake of KP-BFP cells by each phagocytic subset upon TIM4 blockade. The uptake was quantified 5 days after tumor challenge. Dot plot and quantification of one representative of two experiment with n=3 mice/group are shown. Significance was determined by two-tailed unpaired *t*-test, n=3 mice/group. **g)** Relative to Fig 4b. Percentage of cDC2 and AM associated to fluorescence 2hrs after challenge with apoptotic CTV-labelled thymocytes in nLung and KP bearing tumor lungs, treated or not with TIM4 blockade. Representative plots and quantification of two independent experiments are shown, Isotype n=7, Isotype KP(I)=9,  $\alpha$ TIM4 n=8,  $\alpha$ TIM4-KP(I) n=3. Statistical significance was assessed by one-way ANOVA followed by Tukey's post-test. **h)** Proliferation of transferred OTI in the lung of animals carrying early KP-OVA tumors and treated with  $\alpha$ -TIM4 or isotype control antibodies was evaluated by CTV dilution. Representative histogram and quantification show the absolute numbers of adoptively transferred OTI and proliferated OTI (at least one cycle of proliferation) accumulated in the lungs. Significance was determined two-tailed unpaired *t*-test, n=4 mice/group. All data are expressed as mean  $\pm$  SEM. Raw data and statistical analysis are available in source data file.

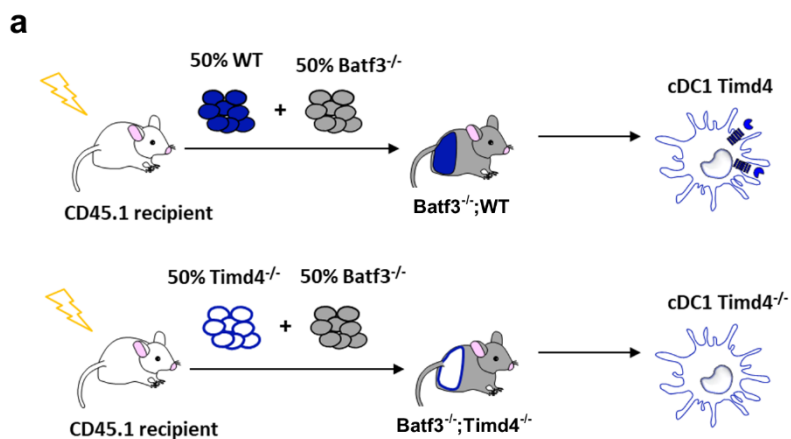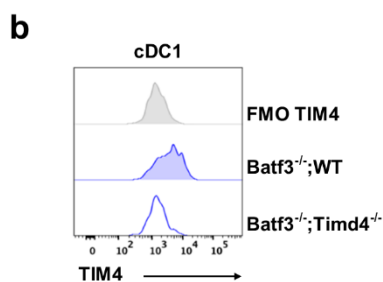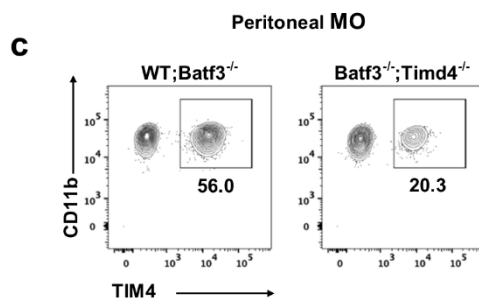

### Supplementary Figure 8. Generation and validation of bone marrow chimeras.

**a)** Graphical representation of mixed bone marrow chimeras generation. Lethally irradiated CD45.1 recipient mice were transplanted with 1:1 ratio of WT;*Batf3*<sup>-/-</sup> or *Timd4*<sup>-/-</sup>;*Batf3*<sup>-/-</sup> BM. **b, c)** Flow cytometry analysis of TIM4 expression by lung cDC1 (**b**) and peritoneal macrophages (**c**) of BM chimeric mice.

| Supplementary Table 1: Differentially expressed genes in cCD1 cells from tumor-bearing and healthy mice |                                                                     |           |             |          |         |
|---------------------------------------------------------------------------------------------------------|---------------------------------------------------------------------|-----------|-------------|----------|---------|
| Gene symbol                                                                                             | Description                                                         | EntrezID  | Fold Change | p-value  | q-value |
| Isg15                                                                                                   | ISG15 ubiquitin-like modifier                                       | 100038882 | 2,45        | 1,91E-04 | 0,0299  |
| Gm26881                                                                                                 | uncharacterized LOC105247101                                        | 105247120 | 2,80        | 2,85E-04 | 0,0299  |
| Scamp1                                                                                                  | 3-hydroxyanthranilate 3,4-dioxygenase                               | 107767    | 4,56        | 7,65E-05 | 0       |
| 3010003L21Rik                                                                                           | ubiquitin-conjugating enzyme E2Q family member 2                    | 109163    | 2,76        | 2,01E-04 | 0,0299  |
| Actn1                                                                                                   | integrin alpha 1                                                    | 109711    | 2,62        | 6,23E-05 | 0       |
| Alcam                                                                                                   | albumin                                                             | 11658     | -2,04       | 8,08E-05 | 0       |
| Cd72                                                                                                    | CD7 antigen                                                         | 12517     | 2,98        | 2,91E-04 | 0,0299  |
| Cfh                                                                                                     | cripto, FRL-1, cryptic family 1                                     | 12628     | -2,84       | 1,73E-04 | 0,0299  |
| Socs1                                                                                                   | suppressor of cytokine signaling 3                                  | 12703     | 2,71        | 6,58E-05 | 0       |
| Cxcr4                                                                                                   | chemokine (C-X-C motif) receptor 3                                  | 12767     | -2,51       | 2,74E-04 | 0,0410  |
| Gfra2                                                                                                   | glial cell line derived neurotrophic factor family receptor alpha 1 | 14586     | -2,34       | 3,56E-04 | 0,0467  |
| Ifi47                                                                                                   | interferon activated gene 204                                       | 15953     | 2,01        | 3,05E-04 | 0,0467  |
| Ifna4                                                                                                   | interferon alpha 11                                                 | 15967     | -2,03       | 2,04E-04 | 0,0410  |
| Klra5                                                                                                   | killer cell lectin-like receptor, subfamily A, member 4             | 16636     | -5,48       | 2,34E-04 | 0,0410  |
| Ltb4r1                                                                                                  | lymphotoxin B                                                       | 16995     | -2,60       | 9,06E-05 | 0       |
| Cd209a                                                                                                  | CD209e antigen                                                      | 170786    | -4,47       | 3,39E-04 | 0,0467  |
| Mgp                                                                                                     | C-type lectin domain family 10, member A                            | 17313     | -3,35       | 1,55E-04 | 0,0299  |
| Ctsa                                                                                                    | PTPRF interacting protein, binding protein 2 (liprin beta 2)        | 19025     | 8,43        | 4,02E-05 | 0       |
| S100a10                                                                                                 | S100 calcium binding protein A1                                     | 20194     | -3,24       | 3,40E-04 | 0,0467  |
| Serpina3g                                                                                               | serine (or cysteine) peptidase inhibitor, clade A, member 3K        | 20715     | 5,67        | 2,82E-04 | 0,0299  |
| Stk10                                                                                                   | cAMP responsive element binding protein 3-like 3                    | 20868     | -2,40       | 3,24E-04 | 0,0410  |
| Tmem63a                                                                                                 | aurora kinase A                                                     | 208795    | 2,80        | 4,81E-05 | 0       |
| Cd226                                                                                                   | zinc binding alcohol dehydrogenase, domain containing 2             | 225825    | -3,29       | 6,07E-05 | 0       |
| Nccrp1                                                                                                  | sterile alpha motif domain containing 4B                            | 233038    | -2,48       | 3,86E-04 | 0,0467  |
| Cd300lf                                                                                                 | DnaJ heat shock protein family (Hsp40) member C28                   | 246746    | 3,86        | 7,92E-05 | 0       |
| Timd4                                                                                                   | olfactory receptor 1371                                             | 276891    | -4,34       | 5,12E-05 | 0       |
| Cass4                                                                                                   | cancer susceptibility candidate 1                                   | 320664    | -2,31       | 1,78E-04 | 0,0299  |
| A530064D06Rik                                                                                           | RIKEN cDNA 9830107B12 gene                                          | 328830    | 2,93        | 6,90E-05 | 0       |
| Scd4                                                                                                    | polycystic kidney disease 2-like 1                                  | 329065    | 2,97        | 2,66E-04 | 0,0299  |
| 2610524H06Rik                                                                                           | potassium channel tetramerisation domain containing 10              | 330173    | 10,03       | 4,18E-05 | 0       |
| Batf                                                                                                    | basic leucine zipper transcription factor, ATF-like                 | 53314     | 3,33        | 1,20E-04 | 0,0251  |
| Bvht                                                                                                    | braveheart long non-coding RNA                                      | 545261    | 5,25        | 8,24E-05 | 0       |
| Cd200r1                                                                                                 | CD200 receptor 1                                                    | 57781     | 2,25        | 2,40E-04 | 0,0299  |
| Ssr2                                                                                                    | signal sequence receptor, beta                                      | 66256     | 2,41        | 1,18E-04 | 0,0251  |
| Swsap1                                                                                                  | SWIM type zinc finger 7 associated protein 1                        | 66962     | 6,29        | 2,18E-04 | 0,0299  |
| 2610301B20Rik                                                                                           | RIKEN cDNA 2610301B20 gene                                          | 67157     | -6,60       | 1,21E-04 | 0,0299  |
| Lrrc18                                                                                                  | leucine rich repeat containing 18                                   | 67580     | -2,20       | 5,64E-05 | 0       |
| 1600010M07Rik                                                                                           | RIKEN cDNA 1600010M07 gene                                          | 69781     | -3,73       | 6,74E-05 | 0       |
| Arhgap19                                                                                                | Rho GTPase activating protein 19                                    | 71085     | 2,78        | 3,04E-04 | 0,0467  |
| 9130008F23Rik                                                                                           | RIKEN cDNA 9130008F23 gene                                          | 71583     | -2,53       | 4,97E-05 | 0       |
| Naalad2                                                                                                 | N-acetylated alpha-linked acidic dipeptidase 2                      | 72560     | -2,91       | 8,39E-05 | 0       |
| Plet1                                                                                                   | placenta expressed transcript 1                                     | 76509     | 3,10        | 2,27E-04 | 0,0299  |
| 2810429I04Rik                                                                                           | RIKEN cDNA 2810429I04 gene                                          | 76937     | -4,52       | 2,53E-04 | 0,0410  |

Significance Analysis of Microarray (SAM) algorithm, with a q-value false discovery rate (FDR) < 0.05 and absolute fold change >2.

**Supplementary Table 2:** Gene signatures used to identify immune subsets and correlation p values (relative to Fig 7)

| Gene signature | Genes in signature                                    | Ref paper | Pearson Corr coeff |                |                        | p values          |                |                        |
|----------------|-------------------------------------------------------|-----------|--------------------|----------------|------------------------|-------------------|----------------|------------------------|
|                |                                                       |           | <i>all stages</i>  | <i>stage I</i> | <i>stage II,III,IV</i> | <i>all stages</i> | <i>stage I</i> | <i>stage II,III,IV</i> |
| cDC1           | CLEC9A, XCR1, CLNK, BATF3                             | 1         | 0,416              | 0,506          | 0,336                  | 9,84E-23          | 2,47E-19       | 1,53E-07               |
| cDC2           | CD1A, CD1C, CD1E, CD207, FCER1A, IRF4                 | 2         | 0,394              | 0,443          | 0,372                  | 2,92E-20          | 1,05E-14       | 4,88E-09               |
| effector CD8   | CD8A, CD8B, CD3E, PRF1, GZMB, GZMK                    | 1         | 0,335              | 0,418          | 0,259                  | 7,89E-15          | 4,44E-13       | 6,41E-05               |
| NK             | NCR1, NCR3, KLRB1, PRF1                               | 1         | 0,357              | 0,46           | 0,263                  | 1,06E-16          | 7,85E-16       | 4,93E-05               |
| Mono-macro     | LYZ, MAFB, CSF1R, CSF1R, CD300E, CD1A                 | 3         | 0,404              | 0,407          | 0,408                  | 2,41E-21          | 1,83E-12       | 1,06E-10               |
| Neutro         | CXCL8, CXCR2, S100A8, FCGR3B, CSFR3, FFAR2            | 2         | 0,237              | 0,196          | 0,277                  | 6,31E-08          | 0,0011         | 1,81E-05               |
| TAM            | CD68, CSFR1, PPAR $\gamma$ , CD64, TREM2, APOE, MARCO | 3         | 0,336              | 0,345          | 0,33                   | 7,69E-15          | 4,09E-09       | 2,59E-07               |

Pearson correlation coefficient in the *cor.test* function of R *stats* package with *two.sided* as alternative hypothesis

**Supplementary Table 3.** Primer sequences

| Oligonucleotides                           | Source                      | Identifiers |
|--------------------------------------------|-----------------------------|-------------|
| Il12b reverse (ACAGGTGAGGTTCACTGTTTCT)     | Integrated DNA technologies | N/A         |
| Il 12a forward (GGCATCCAGCAGCTCCTCTC)      | Integrated DNA technologies | N/A         |
| Il 12a reverse (ACCCTGGCCAAACTGAGGTG)      | Integrated DNA technologies | N/A         |
| Ifna forward (GCA GAA GTC TGG AGA GCC CTC) | Integrated DNA technologies | N/A         |
| Ifna reverse (TGA GAT GCA GTG TTC TGG TCC) | Integrated DNA technologies | N/A         |
| Ifnb forward (GCACTGGGTGGAATGAGTCT)        | Integrated DNA technologies | N/A         |
| Ifnb reverse (AGTGGAGAGCAGTTGAGGACA)       | Integrated DNA technologies | N/A         |



**Supplementary Table 4:** List of antibodies

| Flow Cytometry Antibodies                        | Dilution  | Source                   | Identifiers                         |
|--------------------------------------------------|-----------|--------------------------|-------------------------------------|
| Purified anti-mouse CD16/32 Antibody (93)        | 1:100     | BioLegend                | Cat# 101302,<br>RRID:AB_312801      |
| 7AAD                                             | 5 $\mu$ l | BioLegend                | Cat# 420404                         |
| Annexin-V BV421                                  | 5 $\mu$ l | BioLegend                | Cat# 640923,<br>RRID:AB_2562965     |
| Anti-mouse CD3e (145-2C11) A488                  | 1:200     | BioLegend                | Cat# 100321,<br>RRID:AB_389300      |
| Anti-mouse CD3e (145-2C11) Biotin                | 1:100     | BD Biosciences           | Cat# 553060,<br>RRID:AB_394593      |
| Anti-mouse CD4 (GK1.5) BV785                     | 1:200     | BioLegend                | Cat# 100453,<br>RRID:AB_2565843     |
| Anti-mouse CD8a (53-6.7) APC                     | 1:200     | BioLegend                | Cat# 100711,<br>RRID:AB_312750      |
| Anti-mouse CD11b (M1/70) BV421                   | 1:500     | BD Biosciences           | Cat# 562605,<br>RRID:AB_11152949    |
| Anti-mouse CD11c (N418) A647                     | 1:200     | BioLegend                | Cat# 117314,<br>RRID:AB_492850      |
| Anti-mouse CD19 (1D3) Biotin                     | 1:100     | BD Biosciences           | Cat# 553784,<br>RRID:AB_395048      |
| Anti-mouse CD24 (M1/69) PE/Dazzle™594            | 1:800     | BioLegend                | Cat# 101837,<br>RRID:AB_2566731     |
| Anti-mouse CD31 (390) Biotin                     | 1:100     | BioLegend                | Cat# 102404,<br>RRID:AB_312899      |
| Anti-mouse CD45 (30-F11) APC/Cy7                 | 1:200     | BioLegend                | Cat# 103115,<br>RRID:AB_312980      |
| Anti-mouse CD45.1 (A20) PE                       | 1:200     | Thermo Fisher Scientific | Cat# 12-0453-81,<br>RRID:AB_465674  |
| Anti-mouse CD45.1 (A20) APC                      | 1:300     | BioLegend                | Cat# 110714,<br>RRID:AB_313503      |
| Anti-mouse CD45.2 (104) FITC                     | 1:100     | Thermo Fisher Scientific | Cat# 11-0454-82,<br>RRID:AB_465061  |
| Anti-mouse CD45R/B220 (RA3-6B2) APC-eFluor780    | 1:200     | Thermo Fisher Scientific | Cat# 47-0452-82,<br>RRID:AB_1518810 |
| Anti-mouse CD49b (DX5) APC                       | 1:200     | BioLegend                | Cat# 108909,<br>RRID:AB_313416      |
| Anti-mouse CD64 (X54-5/7.1) BV711                | 1:200     | BioLegend                | Cat# 139311,<br>RRID:AB_2563846     |
| Anti-mouse CD103 (2E7) PE                        | 1:200     | BioLegend                | Cat# 121405,<br>RRID:AB_535948      |
| Anti-mouse CD326/EpCAM (G8.8) BV605              | 1:200     | BioLegend                | Cat# 118227,<br>RRID:AB_2563984     |
| Anti-mouse F4/80 (T45-2342) PE-CF594             | 1:100     | BD Biosciences           | Cat# 565613,<br>RRID:AB_2734770     |
| Anti-mouse H-2Kb bound to SIINFEKL (25-D1.16) PE | 1:200     | BioLegend                | Cat#141603,<br>RRID:AB_10897938     |
| Anti-mouse IFN- $\gamma$ (XMG1.2) PE             | 1:100     | BioLegend                | Cat# 505808,<br>RRID:AB_315402      |
| Anti-mouse IL-12p40 (C15.6)                      | 1:100     | BD Biosciences           | Cat# 554479,<br>RRID:AB_395420      |

|                                                                            |           |                          |                                       |
|----------------------------------------------------------------------------|-----------|--------------------------|---------------------------------------|
| Anti-mouse Ly-6G/Ly-6C (RB6-8C5) Biotin                                    | 1:200     | BD Biosciences           | Cat# 553124,<br>RRID:AB_394640        |
| Anti-mouse Ly6C (HK1.4) A488                                               | 1:100     | BioLegend                | Cat# 128022,<br>RRID:AB_10639728      |
| Anti-mouse Ly6G (1A8) PE                                                   | 1:50      | BioLegend                | Cat# 127608,<br>RRID:AB_1186099       |
| Anti-mouse MerTK (DS5MMER) PE-Cy7                                          | 1:200     | Thermo Fisher Scientific | Cat# 25-5751-82,<br>RRID:AB_2573466   |
| Anti-mouse MHCII (I-A/I-E) (M5/114.15.2) BV711                             | 1:200     | BD Biosciences           | Cat# 563414,<br>RRID:AB_2738191       |
| Anti-mouse MHCII (I-Ab) (AF6-120.1) A488                                   | 1:200     | BioLegend                | Cat# 116410,<br>RRID:AB_493140        |
| Anti-mouse NK1.1 (PK136) FITC                                              | 1:200     | Thermo Fisher Scientific | Cat# 11-5941-82,<br>RRID:AB_465318    |
| Anti-mouse NKp46 (29A1.4) eFluor450                                        | 1:100     | Thermo Fisher Scientific | Cat# 48-3351-82,<br>RRID:AB_10557245  |
| Anti-mouse SiglecF (E50-2440) BB515                                        | 1:200     | BD Biosciences           | Cat# 564514,<br>RRID:AB_2738833       |
| Anti-mouse SiglecF (IRNM44N) PerCP-eFluor 710, eBioscience™                | 1:200     | Thermo Fisher Scientific | Cat# 46-1702-82,<br>RRID:AB_2573724   |
| Anti-mouse SiglecH (551) PercP-Cy5.5                                       | 1:200     | BioLegend                | Cat# 129614,<br>RRID:AB_10643995      |
| Anti-mouse TER-119 (TER-119) Biotin                                        | 1:200     | BioLegend                | Cat# 116203,<br>RRID:AB_313704        |
| Anti-mouse TIM4 (F31-5G3) PE                                               | 1:400     | BioLegend                | Cat# 129905,<br>RRID:AB_1227799       |
| Anti-mouse TCR V $\alpha$ 2 (B20.1) PerCP/Cyanine5.5                       | 1:200     | BioLegend                | Cat# 127814,<br>RRID:AB_1186116       |
| Anti-mouse TCR V beta 5.1/5.2 (MR9-4) eFluor 450, eBioscience™             | 1:200     | Thermo Fisher Scientific | Cat# 48-5796-82,<br>RRID:AB_2574075   |
| Anti-mouse XCR1 (ZET) BV650                                                | 1:200     | BioLegend                | Cat# 148220,<br>RRID:AB_2566410       |
| Pro5® MHC H- 2KbPentamers PE                                               | 5 $\mu$ l | Proimmune                | Cat# F093-2A-E                        |
| Streptavidin APC-Cy7                                                       | 1:200     | BioLegend                | Cat#405208                            |
| Anti-HA High Affinity (3F10)                                               | 1:50      | Roche                    | Cat# 11867423001,<br>RRID:AB_10094468 |
| Goat anti-Rat IgG (H+L) Cross-Adsorbed Secondary Antibody, Alexa Fluor 647 | 1:200     | Thermo Fisher Scientific | Cat# A-21247,<br>RRID:AB_141778       |
| Depleting/blocking antibodies                                              |           |                          |                                       |
| Anti-mouse TIM4 (RMT4-53)                                                  |           | BioXCell                 | Cat# BE0171,<br>RRID:AB_2687695       |
| Anti-mouse CD8 (YTS 169.4)                                                 |           | BioXCell                 | Cat# BE0117,<br>RRID:AB_10950145      |
| Rat IgG2a Isotype control (2A3)                                            |           | BioXCell                 | Cat# BE0089,<br>RRID:AB_1107769       |
| Antibodies for immunohistochemistry                                        |           |                          |                                       |
| Anti-mouse CD8 (4SM15)                                                     | 1:100     | Thermo Fisher Scientific | Cat# 14-0808-82,<br>RRID:AB_2572861   |
| Anti-HA High Affinity (3F10)                                               | 1:50      | Roche                    | Cat# 11867423001,<br>RRID:AB_10094468 |

**Supplementary Table 5:** Flow cytometry panels identification

| Tim4 expression in myeloid cells         |            |
|------------------------------------------|------------|
| CD45                                     | APCCy7     |
| CD11c                                    | APC        |
| MHCII                                    | AF700      |
| SiglecF                                  | PerCPCy5.5 |
| CD64                                     | BV605      |
| CD11b                                    | BV421      |
| CD24                                     | PEDazzle   |
| XCR1                                     | BV650      |
| F4/80                                    | AF488      |
| TIM4                                     | PE         |
| Live/Dead fixable                        | Aqua       |
| TIM4 expression in lung (Neu/Mono/Eo)    |            |
| CD45                                     | APCCy7     |
| CD11b                                    | BV421      |
| SiglecF                                  | PerCPCy5.5 |
| Ly6G                                     | FITC       |
| Ly6C                                     | BV570      |
| CD11c                                    | APC        |
| TIM4                                     | PE         |
| Live/Dead fixable                        | Aqua       |
| TIM4 expression in lung (T cell)         |            |
| CD45                                     | APCCy7     |
| CD3                                      | FITC       |
| CD4                                      | BV785      |
| CD8                                      | APC        |
| TIM4                                     | PE         |
| Live/Dead fixable                        | Aqua       |
| TIM4 expression in peritoneum            |            |
| F4/80                                    | AF488      |
| MHCII                                    | AF700      |
| CD11b                                    | PerCPCy5.5 |
| CD64                                     | BV605      |
| TIM4                                     | PE         |
| Live/Dead fixable                        | Aqua       |
| Isolation of myeloid cells               |            |
| MHCII                                    | BV711      |
| CD11c                                    | APC        |
| SiglecF                                  | PerCPCy5.5 |
| CD64                                     | BV605      |
| CD11b                                    | BV421      |
| CD24                                     | PEDazzle   |
| XCR1                                     | BV650      |
| F4/80                                    | AF488      |
| Uptake of cell associated tumor antigens |            |
| CD45                                     | APCCy7     |
| CD11c                                    | APC        |

|                                                    |            |
|----------------------------------------------------|------------|
| MHCII                                              | AF488      |
| SiglecF                                            | PerCPCy5.5 |
| XCR1                                               | BV650      |
|                                                    | CTV/BFP    |
| Live/Dead fixable                                  | Aqua       |
| In-vivo cross-presentation                         |            |
| CD11c                                              | APC        |
| MHCII                                              | AF488      |
| SiglecF                                            | PerCPCy5.5 |
| CD103                                              | BV421      |
| XCR1                                               | BV650      |
| 25D.1                                              | PE         |
| Live/Dead fixable                                  | Aqua       |
| In-vivo T cell activation                          |            |
| CD45                                               | APCCy7     |
| CD3                                                | PerCPCy5.5 |
| CD8                                                | APC        |
| Pentamers                                          | PE         |
| Live/Dead fixable                                  | Aqua       |
| OTI T cell proliferation assay                     |            |
| CD8                                                | APC        |
|                                                    | CFSE       |
| Live/Dead fixable                                  | Aqua       |
| Proliferation of transferred CD45.1 OT-I T cell    |            |
| CD3                                                | AF488      |
| CD8                                                | APC        |
| CD45.1                                             | PE         |
|                                                    | CTV        |
| Live/Dead fixable                                  | Aqua       |
| IFN- $\gamma$ production by endogenous CD8 T cell  |            |
| CD45                                               | APCCy7     |
| CD3                                                | AF488      |
| CD8                                                | APC        |
| V $\beta$ 5                                        | BV421      |
| V $\alpha$ 2                                       | PerCPCy5.5 |
| IFN- $\gamma$                                      | PE         |
| Live/Dead fixable                                  | Aqua       |
| IFN- $\gamma$ production by transferred OTI T cell |            |
| CD8                                                | AF488      |
| CD45.1                                             | APC        |
| IFN- $\gamma$                                      | PE         |
| Live/Dead fixable                                  | Aqua       |

## Supplementary References (relative to Supplementary Table 2)

- 1 Bottcher, J. P. *et al.* NK Cells Stimulate Recruitment of cDC1 into the Tumor Microenvironment Promoting Cancer Immune Control. *Cell* **172**, 1022-1037 e1014, doi:10.1016/j.cell.2018.01.004 (2018).
- 2 Zilionis, R. *et al.* Single-Cell Transcriptomics of Human and Mouse Lung Cancers Reveals Conserved Myeloid Populations across Individuals and Species. *Immunity* **50**, 1317-1334 e1310, doi:10.1016/j.immuni.2019.03.009 (2019).
- 3 Lavin, Y. *et al.* Innate Immune Landscape in Early Lung Adenocarcinoma by Paired Single-Cell Analyses. *Cell* **169**, 750-765 e717, doi:10.1016/j.cell.2017.04.014 (2017).
